The 47 Counties Population and HIV prevalence in Kenya.

| Code | County                        | Former Province               | Population  | Capital                          | HIV Prevalence(%) |
|------|-------------------------------|-------------------------------|-------------|----------------------------------|-------------------|
|      |                               |                               | Census 2009 |                                  |                   |
|      | <b>Totals</b>                 |                               | 38,610,097  | -                                |                   |
|      | <b>Sub-Totals</b>             | Central                       | 4383743     |                                  |                   |
|      | <b>Sub-Totals</b>             | Coast                         | 3325307     |                                  |                   |
|      | <b>Sub-Totals</b>             | Eastern                       | 5668123     |                                  |                   |
|      | <b>Sub-Totals</b>             | North Eastern                 | 2310757     |                                  |                   |
|      | <b>Sub-Totals</b>             | Nyanza                        | 5442711     |                                  |                   |
|      | <b>Sub-Totals</b>             | Rift Valley                   | 10006805    |                                  |                   |
|      | <b>Sub-Totals</b>             | Western                       | 4334202     |                                  |                   |
| 1    | <a href="#">Mombasa</a>       | <a href="#">Coast</a>         | 939370      | <a href="#">Mombasa (City)</a>   | 7.9               |
| 2    | <a href="#">Kwale</a>         | Coast                         | 649931      | <a href="#">Kwale</a>            | 7.9               |
| 3    | <a href="#">Kilifi</a>        | Coast                         | 1109735     | <a href="#">Kilifi</a>           | 7.9               |
| 4    | <a href="#">Tana River</a>    | Coast                         | 240075      | <a href="#">Hola</a>             | 7.9               |
| 5    | <a href="#">Lamu</a>          | Coast                         | 101539      | <a href="#">Lamu</a>             | 7.9               |
| 6    | <a href="#">Taita-Taveta</a>  | Coast                         | 284657      | <a href="#">Voi</a>              | 7.9               |
| 7    | <a href="#">Garissa</a>       | <a href="#">North Eastern</a> | 623060      | <a href="#">Garissa</a>          | 1                 |
| 8    | <a href="#">Wajir</a>         | North Eastern                 | 661941      | <a href="#">Wajir</a>            | 1                 |
| 9    | <a href="#">Mandera</a>       | North Eastern                 | 1025756     | <a href="#">Mandera</a>          | 1                 |
| 10   | <a href="#">Marsabit</a>      | <a href="#">Eastern</a>       | 291166      | <a href="#">Marsabit</a>         | 4.7               |
| 11   | <a href="#">Isiolo</a>        | Eastern                       | 143294      | <a href="#">Isiolo</a>           | 4.7               |
| 12   | <a href="#">Meru</a>          | Eastern                       | 1356301     | <a href="#">Meru</a>             | 4.7               |
| 13   | <a href="#">Tharaka-Nithi</a> | Eastern                       | 365330      | <a href="#">Chuka</a>            | 4.7               |
| 14   | <a href="#">Embu</a>          | Eastern                       | 516212      | <a href="#">Embu</a>             | 4.7               |
| 15   | <a href="#">Kitui</a>         | Eastern                       | 1012709     | <a href="#">Kitui</a>            | 4.7               |
| 16   | <a href="#">Machakos</a>      | Eastern                       | 1098584     | <a href="#">Machakos</a>         | 4.7               |
| 17   | <a href="#">Makueni</a>       | Eastern                       | 884527      | <a href="#">Wote</a>             | 4.7               |
| 18   | <a href="#">Nyandarua</a>     | <a href="#">Central</a>       | 596268      | <a href="#">Ol Kalou</a>         | 3.8               |
| 19   | <a href="#">Nyeri</a>         | Central                       | 693558      | <a href="#">Nyeri</a>            | 3.8               |
| 20   | <a href="#">Kirinyaga</a>     | Central                       | 528054      | <a href="#">Kerugoya / Kutus</a> | 3.8               |
| 21   | <a href="#">Murang'a</a>      | Central                       | 942581      | <a href="#">Murang'a</a>         | 3.8               |
| 22   | <a href="#">Kiambu</a>        | Central                       | 1623282     | <a href="#">Kiambu</a>           | 3.8               |
| 23   | <a href="#">Turkana</a>       | <a href="#">Rift Valley</a>   | 855399      | <a href="#">Lodwar</a>           | 7                 |
| 24   | <a href="#">West Pokot</a>    | Rift Valley                   | 512690      | <a href="#">Kapenguria</a>       | 7                 |
| 25   | <a href="#">Samburu</a>       | Rift Valley                   | 223947      | <a href="#">Maralal</a>          | 7                 |
| 26   | <a href="#">Trans Nzoia</a>   | Rift Valley                   | 818757      | <a href="#">Kitale</a>           | 7                 |
| 27   | <a href="#">Uasin Gishu</a>   | Rift Valley                   | 894179      | <a href="#">Eldoret</a>          | 7                 |

|       |                        |                |          |                       |      |
|-------|------------------------|----------------|----------|-----------------------|------|
| 28    | <u>Elgeyo-Marakwet</u> | Rift Valley    | 369998   | <u>Iten</u>           | 7    |
| 29    | <u>Nandi</u>           | Rift Valley    | 752965   | <u>Kapsabet</u>       | 7    |
| 30    | <u>Baringo</u>         | Rift Valley    | 555561   | <u>Kabarnet</u>       | 7    |
| 31    | <u>Laikipia</u>        | Rift Valley    | 399227   | <u>Rumuruti</u>       | 7    |
| 32    | <u>Nakuru</u>          | Rift Valley    | 1603325  | <u>Nakuru</u>         | 7    |
| 33    | <u>Narok</u>           | Rift Valley    | 850920   | <u>Narok</u>          | 7    |
| 34    | <u>Kajiado</u>         | Rift Valley    | 687312   | <u>Kajiado</u>        | 7    |
| 35    | <u>Kericho</u>         | Rift Valley    | 752396   | <u>Kericho</u>        | 7    |
| 36    | <u>Bomet</u>           | Rift Valley    | 730129   | <u>Bomet</u>          | 7    |
| 37    | <u>Kakamega</u>        | <u>Western</u> | 1660651  | <u>Kakamega</u>       | 5.1  |
| 38    | <u>Vihiga</u>          | Western        | 554622   | <u>Vihiga</u>         | 5.1  |
| 39    | <u>Bungoma</u>         | Western        | 1375063  | <u>Bungoma</u>        | 5.1  |
| 40    | <u>Busia</u>           | Western        | 743946   | <u>Busia</u>          | 5.1  |
| 41    | <u>Siaya</u>           | <u>Nyanza</u>  | 842304   | <u>Siaya</u>          | 15.3 |
| 42    | <u>Kisumu</u>          | Nyanza         | 968909   | <u>Kisumu</u>         | 15.3 |
| 43    | <u>Homa Bay</u>        | Nyanza         | 963794   | <u>Homa Bay</u>       | 15.3 |
| 44    | <u>Migori</u>          | Nyanza         | 917170   | <u>Migori</u>         | 15.3 |
| 45    | <u>Kisii</u>           | Nyanza         | 1152282  | <u>Kisii</u>          | 15.3 |
| 46    | <u>Nyamira</u>         | Nyanza         | 598252   | <u>Nyamira</u>        | 15.3 |
| 47    | <u>Nairobi</u>         | <u>Nairobi</u> | 3138369  | <u>Nairobi (City)</u> | 9    |
| Total |                        |                | 38610097 |                       |      |

Source: [https://en.wikipedia.org/wiki/Counties\\_of\\_Kenya](https://en.wikipedia.org/wiki/Counties_of_Kenya) and The National AIDS and STI Control Programme (2008) Kenya AIDS indicator survey 2007.
